# Supplementary material for: Helical geometry and liquid crystalline properties of 2,3,6,7,10,11-hexaalkoxy-1-nitrotriphenylenesElectronic supplementary information (ESI) available: calculation of dipolar interactions, details of syntheses and analytical data, DSC data, and full details of the single-crystal structure factors plus projections along the crystallographic axes. See http://www.rsc.org/suppdata/jm/b2/b211133k/
Source: Royal Society of Chemistry journal article supplement (doi:10.1039/b211133k), 2003-02-03
Supplement: b211133k.doc [file b211133k.doc]

Supplementary information.

Calculation of the dipole-dipole interactions

The dipole-dipole interaction between the molecules was estimated using the relationship V=12(1-3cos2)/(4r0r3), where r is the distance between the centers of dipoles 1 and 2 and  is the angle between the dipole  and the line connecting the centers of the dipoles. In the first instance the literature value for the dipole moment in nitrobenzene (1 = 2 = 4.3D)1 was used along with the distance (r) and angle () between the C-NO2 dipoles measured from the X-ray crystal structure. The dipolar attraction between the two molecules in this case was V=-5.46 kJ mol-1 (=4.3 D, r=8.61 Å, =2°, 0=4 the bulk value of r measured at -100°C, 1kHz, in HAT5-NO2).2 Another estimate was obtained using values for the molecular dipoles estimated using density functional methods. A STO-31G basis-set with B3LYP electron correlation,3 gives a reasonable estimate of =4.2D for nitrobenzene;4 for HAT6-NO2 this method calculates =5.96D. The vector components of the dipole moments and the position vectors of the molecules with respect to the inversion center are used to calculate r and , arriving at an estimate of V=-5.86 kJ mol-1 ( = 5.96 D, r=10.57 Å, =26.1° and 0=4), Both values are in good agreement indicating that the C-NO2 dipole is almost exclusively responsible for the dipole-dipole interaction between the molecules. A similar calculation based upon the C-CN dipole for 4-hexyloxy-4’’-cyanobiphenyl (=4.77D, r=10.44Å, =25.03°, r=4)5 yields a calculated stabilision of -2.85kJ mol‑1for nearest neighbors. It should be noted that in this case the molecules are not related through an inversion centre so the effect of non-nearest neighbours is not negligable.

Experimental details.

General procedures and instrumentation.

Nuclear magnetic resonance spectra were recorded on a Bruker DPX300 spectrometer. Chemical shifts are expressed in parts per million (ppm) downfield of tetramethylsilane for 1H resonance. Mass spectra were recorded on a VG Autospec mass spectrometer. Microanalyses were carried out at Leeds University Microanalytical Laboratory. All C, H, and N analytical figures are percentage values. Thin layer chromatography was carried out using precoated plastic backed silica plate which was visualized using ultraviolet light. Flash chromatography signifies column chromatography on Merck silica gel (230-400). Petroleum ether refers to petroleum ether (b.p. 40-60°C) unless otherwise stated.

Typical procedure for the synthesis of 1,2-dialkyloxybenzene derivatives.

Catechol (15 g, 0.136 mol), potassium carbonate (47.0 g, 0.341 mol) and 1-bromobutane (46.7 g, 0.341 mol) were added to ethanol (100 ml) and heated under reflux for 48 h. After cooling, dichloromethane (100 ml) was added and the solid residues removed by filtration. The solvents were then removed *in vacuo* and the crude product was distilled under reduced pressure to give 1,2-dibutyloxybenzene (25.7 g, 85%) as a colourless liquid. H (CHCl3) 6.90 (s, 4H, Ar*H*), 4.02 (t, J=7Hz, 4H, ArO*CH2*), 1.86 (m, 4H, ArOCH2*CH2*), 1.60-1.53 (m, 4H, ArOCH2CH2*CH2*),0.95 (t, J=7Hz, 6H, CH2*CH3*).

Typical procedure for the synthesis of 2,3,6,7,10,11-hexaalkyloxytriphenylene (HATn) derivatives.

Ferric chloride (30.6 g, 0.189 mol) was slowly added to 1,2-dibutyloxybenzene (14.0 g, 0.0631 mol) solution in dichloromethane (200 ml) under nitrogen. The mixture was stirred for 70 min. at room temperature and then poured onto methanol (700 ml). The crude solid product precipitated after 2 h. in the fridge and was filtered and washed with ethanol. The crude product was realkylated with 1-bromo-butane in ethanol. The product was purified by column chromatography on silica gel using dichloromethane and petroleum spirit (1:1) as eluent and then recrystallised from ethanol as a white solid (12.5 g, 90%)

Analytical Data for the HATn derivatives

2,3,6,7,10,11-hexaethoxytriphenylene HAT2. a white solid, 50%. Cr-I 242.5C. H (CHCl3) 7.84 (s, 6H, Ar*H*), 4.34 (q, J=6.9Hz, 12H, ArO*CH2*), 1.56 (t, J=6.9Hz, 18H, ArOCH2*CH3*).MS (FAB), 492 (M+, 100%). Calculated for C30H36O6, C, 73.15, H, 7.37; Found: C, 73.0, H, 7.50.

2,3,6,7,10,11-hexapropoxytriphenylene HAT3. a white solid, 51%. Cr-Colhp, 100C; Colhp-I 174.3C. H (CHCl3) 7.84 (s, 6H, Ar*H*), 4.21 (t, J=6.6Hz, 12H, ArO*CH2*), 1.96 (m, 12H, ArOCH2*CH2*), 1.15(t, J=7.4Hz, 18H, ArOCH2CH2*CH3*).MS (FAB), 576 (M+, 100%); Calculated for C36H48O6, C, 74.97, H, 8.39; Found: C, 74.90, H, 8.43.

2,3,6,7,10,11-hexabutoxytriphenylene HAT4. a white solid, 90%. Cr-Colh 90 C, Colh-I 148 C; H (CHCl3) 7.85 (s, 6H, Ar*H*), 4.21 (t, J=7Hz, 12H, ArO*CH2*), 1.95 (m, 12H, ArOCH2*CH2)*, 1.65-1.55 (m, 12H, ArOCH2CH2C*H2),* 1.06 (t, J=7Hz, 18H, ArOCH2CH2CH2*CH3).* MS (EI), 660 (M+, 100%); Calculated for C42H60O6, C, 76.33, H, 9.15; Found: C, 76.60, H, 9.20.

2,3,6,7,10,11-hexahexyloxytriphenylene HAT6. a white solid, 87%. Cr-Colh 67 C, Colh-I 100 C; H (CHCl3) 7.86 (s, 6H, Ar*H*), 4.25 (t, J=6.8Hz, 12H, ArO*CH2*), 1.95 (m, 12H, ArOCH2C*H2)*, 1.55-1.40 (m, 36H, *CH2*), 0.95 (t, J=7Hz, 18H, *CH3*)*.* MS (EI), 828 (M+, 100%); Calculated for C54H84O6, C, 78.21, H, 10.21; Found: C, 78.40, H, 10.25.

2,3,6,7,10,11-hexanonyloxytriphenylene HAT9. a white solid, 93%. Cr-Colh 59C, Colh-I 81C; H (CHCl3) 7.85 (s, 6H, Ar*H*), 4.22 (t, 12H, J 6.8 ArO*CH2*), 1.95 (m, 12H, ArOCH2*CH2)*, 1.55-1.30 (m, 72H, *CH2*),0.91 (t, J 7, 18H, *CH3*). MS (FAB), 1081 ([M+1]+, 100%); Calculated for C72H120O6, C, 79.94, H, 11.18; Found: C, 79.80, H, 11.00.

2,3,6,7,10,11-hexaundecyloxytriphenylene HAT11. a white solid, 87%. Cr-Colh 53C, Colh-I 66C. H (CHCl3) 7.86 (s, 6H, Ar*H*), 4.20 (t, J=6.8Hz, 12H, ArO*CH2*), 1.95 (m, 12H, ArOCH2*CH2)*, 1.55-1.30 (m, 96H, *CH2*), 0.91 (t, J=7Hz, 18H, *CH3*). MS (FAB), 1250 (M+, 73%), 176 (100%); Calculated for C84H144O6, C, 80.71, H, 11.61; Found: C, 80.85, H, 11.65.

2,3,6,7,10,11-hexadodecyloxytriphenylene HAT12. a white solid, 70%. Cr-I 64C H (CHCl3) 7.85 (s, 6H, Ar*H*), 4.21 (t, J=7Hz, 12H, ArO*CH2*), 1.95 (m, 12H, ArOCH2*CH2*), 1.55-1.30 (m, 108H, *CH2*), 1.06 (t, J=7Hz, 18H, *CH3*). MS (FAB) 1332(M+, 57%); 1333 ([M+1]+, 58%); Calculated for C90H156O6, C, 81.02, H, 11.79; Found: C, 80.75, H, 11.65.

2,3,6,7,10,11-hexatetradecyloxytriphenylene HAT14. a white solid, 70%, Cr-I 56.9C. H (CHCl3) 7.85 (s, 6H, Ar*H*), 4.21 (t, J=7Hz, 12H, ArO*CH2*), 1.95 (m, 12H, ArOCH2*CH2*), 1.55-1.30 (m, 132H, *CH2*), 1.06 (t, J=7Hz, 18H, C*H3*). MS (FAB), 1501 (M+, 79.4%). Calculated for C102H180O6, C, 81.54, H, 12.07; Found: C, 81.4, H, 12.35.

2,3,6,7,10,11-hexahexadecyloxytriphenylene HAT16. a white solid, 81%, Cr-I 58.8C. H (CHCl3) 7.85 (s, 6H, Ar*H*), 4.21 (t, J=7Hz, 12H, ArO*CH2*), 1.95 (m, 12H, ArOCH2*CH2*), 1.55-1.30 (m, 156H, *CH2*), 1.06 (t, J=7Hz, 18H, C*H3*). MS (FAB), 1668 (M+, 100%). Calculated for C114H204O6, C, 81.95, H, 12.31; Found: C, 81.8, H, 12.3.

Typical procedure for the synthesis of 1-nitro-2,3,6,7,10,11-hexaalkyloxytriphenylene HATn-NO2 derivatives.

Nitric acid (70%, 0.25 g, 2.78 mmol) was added to HAT4 (1.84 g, 2.78 mmol) solution in dichloromethane (30 ml) and nitromethane (5 ml) at room temperature, and stirred for 15 min. Saturated aqueous sodium hydrogen carbonate solution was then added and the product was extracted with dichloromethane, dried (MgSO4), concentrated and purified by column chromatography on silica gel using dichloromethane petroleum (1:1) spirit as eluent and then recrystallised from ethanol as a yellow solid (1.57 g, 80%).

Analytical Data for the HATn-NO2 derivatives

1-Nitro-2,3,6,7,10,11-hexaethoxytriphenylene HAT2-NO2 . a yellow solid, 50%. Cr-I 179.0C. H (CHCl3) 7.90 (s, 1H, Ar*H*), 7.78 (s, 1H, Ar*H*), 7.75 (s, 2H, Ar*H*), 7.47(s, 1H, Ar*H*), 4.33 (m, 10H, ArO*CH2*), 4.19 (t, J=7.0Hz, 2H, ArO*CH2*), 1.59 (m, 12H, ArOCH2*CH3*), 1.41 (t, J=7.0Hz, ArOCH2C*H3*). MS (EI), 537 (M+, 100%); Calculated for C30H35NO8, C, 67.02, H, 6.56; N, 2.61 Found: C, 67.02, H, 6.55, N, 2.55.

1-Nitro-2,3,6,7,10,11-hexapropoxytriphenylene HAT3-NO2. a yellow solid, 70%. Cr-Colh 131.6C, Colh-I 147.5C; H (CHCl3) 7.93 (s, 1H, Ar*H*), 7.81 (s, 1H, Ar*H*), 7.79 (s, 2H, Ar*H*), 7.49 (s, 1H, Ar*H*), 4.21 (m, 10H, ArO*CH2*), 4.05 (t, J=6.6Hz, 2H, ArO*CH2*), 2.10-1.60 (m, 12H, ArOCH2C*H2*), 1.14 (m, 15H, ArOCH2CH2*CH3*),1.05 (t, J=7.4Hz, 3H, ArOCH2CH2*CH3*)*.* MS (EI), 621 (M+, 100%); Calculated for C36H47NO8, C, 69.54, H, 7.62; N, 2.25 Found: C, 69.35, H, 7.65, N, 2.1.

1-Nitro-2,3,6,7,10,11-hexaebutoxytriphenylene HAT4-NO2. a yellow solid, 80%. Cr-Colh 52 C, Dh-I 143 C; H (CHCl3) 7.92 (s, 1H, Ar*H*), 7.80 (s, 1H, Ar*H*), 7.78 (s, 2H, Ar*H*), 7.48 (s, 1H, Ar*H*), 4.28-4.20 (m, 10H, ArO*CH2*), 4.09 (t, J=6.5Hz, 2H, ArO*CH2*), 1.95-1.72 (m, 12H, ArOCH2*CH2)*, 1.65-1.45 (m, 12H, ArOCH2CH2*CH2),* 1.10-0.92 (m, 18H, *CH3).* MS (EI), 705 (M+, 100%); Calculated for C42H59NO8, C, 71.46, H, 8.42; N, 1.98 Found: C, 71.25, H, 8.70, N, 1.90.

1-Nitro-2,3,6,7,10,11-hexapentoxytriphenylene HAT5-NO2. a yellow solid, 81%. Cr-Colh -20C, Dh-I 141.4C; H (CHCl3) 7.90 (s, 1H, Ar*H*), 7.79 (s, 1H, Ar*H*), 7.76 (s, 2H, Ar*H*), 7.47 (s, 1H, Ar*H*), 4.23 (m, 10H, ArO*CH2*), 4.08 (t, J7, 2H, ArO*CH2*), 1.96-1.80 (m, 12H, ArOCH2C*H2)*, 1.64-1.38 (m, 24H, *CH2*), 0.95 (t, J 7, 18H, C*H3*). MS (EI), 789 (M+, 100%); Calculated for C48H71NO8, C, 72.97, H, 9.06; N, 1.77, Found: C, 72.95, H, 9.15, N, 1.7.

1-Nitro-2,3,6,7,10,11-hexahexyloxytriphenylene HAT6-NO2. a yellow solid , 79%. Cr-Colh -20C, Dh-I 137 C; H (CHCl3) 7.88 (s, 1H, Ar*H*), 7.79 (s, 1H, Ar*H*), 7.75 (s, 2H, Ar*H*), 7.50 (s, 1H, Ar*H*), 4.20 (m, 10H, ArO*CH2*), 4.05 (t, J7, 2H, ArO*CH2*), 1.96-1.80 (m, 12H, ArOCH2*CH2)*, 1.64-1.38 (m, 36H, *CH2*), 0.95 (t, J 7, 18H, *CH3*). MS (EI), 873 (M+, 100%); Calculated for C54H83NO8, C, 74.19, H, 9.57; N, 1.60, Found: C, 74.10, H, 9.80, N, 1.60.

1-Nitro-2,3,6,7,10,11-hexaoctyloxytriphenylene HAT8-NO2. a yellow solid , 80%. Cr-Colh -20C, Dh-I 128.4C; H (CHCl3) 7.88 (s, 1H, Ar*H*), 7.78 (s, 1H, Ar*H*), 7.75 (s, 2H, Ar*H*), 7.47 (s, 1H, Ar*H*), 4.22 (m, 10H, ArO*CH2*), 4.07 (t, J=7Hz, 2H, ArO*CH2*), 1.96-1.80 (m, 12H, ArOCH2*CH2)*, 1.64-1.38 (m, 60H, *CH2*), 0.95 (t, J=7Hz, 18H, *CH3*). MS (FAB), 1041 (M+, 100%); Calculated for C66H107NO8, C, 76.04, H, 10.34; N, 1.34, Found: C, 76.15, H, 10.35, N, 1.25.

1-Nitro-2,3,6,7,10,11-hexanonyloxytriphenylene HAT9-NO2. a yellow solid, 78%. Cr-Colh 0C, Colh-I 127 C; H (CHCl3) 7.87 (s, 1H, Ar*H*), 7.78 (s, 1H, Ar*H*), 7.75 (s, 2H, Ar*H*), 7.50 (s, 1H, Ar*H*), 4.20 (m, 10H, ArO*CH2*), 4.05 (t, J=7Hz, 2H, ArO*CH2*), 1.96-1.80 (m, 12H, ArOCH2*CH2*), 1.64-1.38 (m, 72H, *CH2*), 0.95 (t, J=7Hz, 18H, *CH3*). MS (FAB), 1126 ([M+1]+, 100%); Calculated for C72H119NO8, C, 76.75, H, 10.64, N, 1.24, Found: C, 76.55, H, 10.85, N, 1.05.

1-Nitro-2,3,6,7,10,11-hexadecyloxytriphenylene HAT10-NO2. a yellow solid, 75%. Cr-Colh 7.1C, Colh-I 118.4C. H (CHCl3) 7.87 (s, 1H, Ar*H*), 7.78 (s, 1H, Ar*H*), 7.75 (s, 2H, Ar*H*), 7.50 (s, 1H, Ar*H*), 4.20 (m, 10H, ArO*CH2*), 4.05 (t, J=7Hz, 2H, ArO*CH2*), 1.96-1.80 (m, 12H, ArOCH2*CH2*), 1.64-1.38 (m, 84H, *CH2*), 0.95 (t, J=7Hz, 18H, C*H3*). MS (FAB), 1209 (M+, 81%); Calculated for C78H131NO8, C, 77.37, H, 10.90, N, 1.16, Found: C, 77.6, H, 11.1, N, 0.95.

1-Nitro-2,3,6,7,10,11-hexaundecyloxytriphenylene HAT11-NO2. a yellow solid, 85%. Cr-Colh 37.3C, Colh-I 116C; H (CHCl3) 7.87 (s, 1H, Ar*H*), 7.78 (s, 1H, Ar*H*), 7.75 (s, 2H, Ar*H*), 7.50 (s, 1H, Ar*H*), 4.20 (m, 10H, ArO*CH2*), 4.05 (t, J=7Hz, 2H, ArO*CH2*), 1.96-1.80 (m, 12H, ArOCH2*CH2*), 1.64-1.38 (m, 96H, *CH2*), 0.95 (t, J=7Hz, 18H, *CH3*). MS (FAB), 1294 ([M+1], 63%), 69 (100%); Calculated for C84H143NO8, C, 77.91, H, 11.13, N, 1.08; Found: C, 78.00, H, 11.35, N, 0.90.

1-Nitro-2,3,6,7,10,11-hexadodecyloxytriphenylene HAT12-NO2. a yellow solid, 76%. Cr-Colh 39.8C, Colh-I 107.7C. H (CHCl3) 7.90 (s, 1H, Ar*H*), 7.79 (s, 1H, Ar*H*), 7.76 (s, 2H, Ar*H*), 7.47 (s, 1H, Ar*H*), 4.22 (m, 10H, ArO*CH2*), 4.07 (t, J=7Hz, 2H, ArO*CH2*), 1.96-1.80 (m, 12H, ArOCH2C*H2*), 1.64-1.38 (m, 108H, *CH2*),0.95 (t, J= 7Hz, 18H, *CH3*). MS (FAB), 1377 (M+, 14%); Calculated for C90H155NO8, C, 78.38, H, 11.33, N, 1.02; Found: C, 78.4, H, 11.6, N, 0.9.

1-Nitro-2,3,6,7,10,11-hexatetradecyloxytriphenylene HAT14-NO2. a yellow solid, 77%. Cr-Colh 52C, Colh-I 97.0C. H (CHCl3) 7.92 (s, 1H, Ar*H*), 7.80 (s, 1H, Ar*H*), 7.78 (s, 2H, Ar*H*), 7.48 (s, 1H, Ar*H*), 4.21 (m, 10H, ArO*CH2*), 4.07 (t, J7, 2H, ArO*CH2*), 1.96-1.80 (m, 12H, ArOCH2*CH2*), 1.64-1.38 (m, 132H, *CH2*),0.95 (t, J 7, 18H, C*H3*)*.* MS (FAB), 1547 (M+, 8.4%), 1548 ([M+1]+, 11%); Calculated for C102H179NO8, C, 79.17, H, 11.66, N, 0.91; Found: C, 78.95, H, 11.75, N, 0.85.

1-Nitro-2,3,6,7,10,11-hexahexadecyloxytriphenylene HAT16-NO2. a yellow solid, 70%. Cr-Colh 63.9C, Colh-I 86.1C. H (CHCl3) 7.92 (s, 1H, Ar*H*), 7.80 (s, 1H, Ar*H*), 7.78 (s, 2H, Ar*H*), 7.48 (s, 1H, Ar*H*), 4.21 (m, 10H, ArO*CH2*), 4.07 (t, J=7Hz, 2H, ArO*CH2*), 1.96-1.80 (m, 12H, ArOCH2*CH2*), 1.64-1.38 (m, 156H, *CH2*),0.95 (t, J= 7Hz, 18H, C*H3*)*.* MS (FAB), 1715 (M+, 100%); Calculated for C114H203NO8, C, 79.80, H, 11.92, N, 0.82; Found: C, 79.6, H, 11.75, N, 0.75.

Summary of Phase Behaviours

**Table 1** Phase transition temperatures of HATn and HATn-NO2 series studied in this investigation as determined by DSC. Heating and Cooling rate 10 °C min-1 in sealed Al pans. Transition temperatures are given in °C (J g-1). References are given to values taken from the literature.

| |  | Sample | 1st Heating Run | Cooling Run |  | | --- | --- | --- | --- | --- | |  | HAT2 | **Cr** 242.5 (125.8) **I** | **I** 239.2 (-134.3) **Cr** |  | |  | HAT2–NO2 | **Cr** 179.0 (66.2) **I** | **I** 168.1 (-65.4 ) **Cr** |  | |  | HAT3 | **Cr** 99.9 (23.8) **Colhp** 174.3 (31.6) **I** | **I** 173.2 (-33.4) **Colhp** |  | |  | HAT36,7 | **Cr** 177 **I** |  |  | |  | HAT3–NO2 | **Cr** 131.6 (17.6) **Col** 147.5 (16.0) **I** | **I** 147.7 (-15.8) **Col** 93.3 (-2.2) **Cr** |  | |  | HAT46-9 | **Cr** 89 **Colhp** 146 **I** |  |  | |  | HAT4–NO2 | **Cr** 53 (1.3) **Col** 143.3 (12.6) **I** | **I** 142.0 (-12.5 ) **Col** |  | |  | HAT5**6,8,9** | **Cr** 69 **Colh** 122 **I** |  |  | |  | HAT5–NO2 | **Cr** <-20 **Col** 141.4 (7.7) **I** | **I** 140.3 (-7.7) **Col** <-20 |  | |  | HAT6**7** | **Cr** 68 **Colh** 100 **I** |  |  | |  | HAT6–NO2 | **Cr** <-20 **Col** 137.0 (8.4) **I** | **I** 135.9(-8.0) **Col** < -20 |  | |  | HAT7**6,8,10** | **Cr** 69 **Colh** 93 **I** |  |  | |  | HAT7–NO2 | **Cr** <-20 **Col** 129.3 (6.3) **I** | **I** 126.6 (-5.5) **Col** < -20 |  | |  | HAT8**6-8** | **Cr** 67 **Colh** 86 **I** |  |  | |  | HAT8–NO2 | **Cr** <-20 **Col** 128.4( 5.6) **I** | **I** 125.9(-5.8) **Col** < -20 |  | |  | HAT9**6-8** | **Cr** 57 **Colh** 78 **I** |  |  | |  | HAT9–NO2 | **Cr** 0 (14.8) **Col** 127.0 (6.3) **I** | **I** 126.0 (-6.1) **Col** –7.5 (-15.0) **Cr** |  | |  | HAT106,8 | **Cr** 58 **Col**h 69 **I** |  |  | | HAT10–NO2 | | **Cr** 7.1 (15.8) **Col** 118.4 (5.2) **I** | **I** 116.4 (-4.9) **Col** –1.0 (-17.3) **Cr** | | | HAT11**6,8,10** | | **Cr** 54 **Col**h 66 **I** |  | | | HAT11–NO2 | | **Cr1** 27.0 (16.1) **Cr2** 37.3 (6.2 ) **Col** 116.0 (5.2) **I** | **I** 116.0 (-5.1) **Col** 13.2 (-24.9) **Cr** | | | HAT12 | | **Cr** 64 (71) **I** | **I** 45( -71) **Cr** | | | HAT12–NO2 | | **Cr1** 31.0 (11.6 ) **Cr2** 39.8 (6.9) **Col** 107.7 (3.6) **I** | **I** 105.4 (-3.4) **Col** 18.5 (-25.0 ) **Cr** | | | HAT14 | | **Cr** 56.9 (56.0) **I** | **I** 47.2 (-62.3) **Cr** | | | HAT14–NO2 | | **Cr1** 40.6 (16.4 ) **Cr2** 52.0 (18.3 ) **Col** 97.0 (3.4) **I** | **I** 95.0 (-3.2) **Col** 31.2 (-29.3) **Cr** | | | HAT16 | | **Cr1** 53.4 **Cr2** 58.8 (71.6) **I** | **I** 51.6(-74.8) **Cr** | | | HAT16–NO2 | | **Cr1** 37.5(19) **Cr2** 63.9 (53) **Col** 86.1(3.4) **I** | **I** 84.1(-2.8) **Col** 42.7 (-42.3 ) **Cr**2 28.3 (-19.3 ) **Cr1** | | |
| --- | --- | --- | --- | --- | --- | --- | --- | --- | --- | --- | --- | --- | --- | --- | --- | --- | --- | --- | --- | --- | --- | --- | --- | --- | --- | --- | --- | --- | --- | --- | --- | --- | --- | --- | --- | --- | --- | --- | --- | --- | --- | --- | --- | --- | --- | --- | --- | --- | --- | --- | --- | --- | --- | --- | --- | --- | --- | --- | --- | --- | --- | --- | --- | --- | --- | --- | --- | --- | --- | --- | --- | --- | --- | --- | --- | --- | --- | --- | --- | --- | --- | --- | --- | --- | --- | --- | --- | --- | --- | --- | --- | --- | --- | --- | --- | --- | --- | --- | --- | --- | --- | --- | --- | --- | --- | --- | --- | --- | --- | --- | --- | --- | --- | --- | --- | --- | --- | --- | --- | --- | --- | --- | --- | --- | --- | --- | --- | --- | --- | --- | --- | --- | --- | --- | --- | --- | --- | --- | --- | --- |

Crystallographic information and 3-D Structures (CCDC 185127)

**Table 1** Crystal data and structure refinement

| | Formula | C30H35NO8 | | --- | --- | | Formula weight | 537.59 | | Size | 0.31 x 0.18 x 0.16 mm | | Crystal morphology | Orange prism | | Temperature | 100(2) K | | Wavelength | 0.71073 Å [Mo-*K*] | | Crystal system | Triclinic | | Space group | *P*1 | | Unit cell dimensions | *a* = 9.4054(2) Å = 70.1430(10)° | |  | *B* = 10.8386(2) Å = 73.7890(10)° | |  | *c* = 14.5913(4) Å = 89.6730(10)° | | Volume | 1336.84(5) Å3 | | *Z* | 2 | | Density (calculated) | 1.336 Mg/m3 | | Absorption coefficient | 0.097 mm-1 | | *F*(000) | 572 | | Data collection range | 2.86  26° | | Index ranges | -11  *h* 11, -13  *k*  13, -17  *l*  17 | | Reflections collected | 24207 | | Independent reflections | 5217 [*R*(int) = 0.0868] | | Observed reflections | 4526 [*I* >2(*I*)] | | Absorption correction | multi-scan | | Max. and min. transmission | 0.9847 and 0.9706 | | Refinement method | Full | | Data / restraints / parameters | 5217 / 0 / 359 | | Goodness of fit | 1.047 | | Final *R* indices [*I* >2(*I*)] | *R*1 = 0.0536, *wR*2 = 0.1427 | | *R* indices (all data) | *R*1 = 0.061, *wR*2 = 0.1497 | | Extinction parameter | 0.028(6) | | Largest diff. peak and hole | 0.426 and -0.331e.Å-3 | |
| --- | --- | --- | --- | --- | --- | --- | --- | --- | --- | --- | --- | --- | --- | --- | --- | --- | --- | --- | --- | --- | --- | --- | --- | --- | --- | --- | --- | --- | --- | --- | --- | --- | --- | --- | --- | --- | --- | --- | --- | --- | --- | --- | --- | --- | --- | --- | --- | --- | --- | --- | --- | --- | --- | --- | --- | --- | --- | --- | --- | --- |

Comparison of the single crystal structures of HAT2-NO2 with other triphenylene derivatives.

HAT1, HAT2 and HAT2-NO2.

“Unlike HAT0, HAT1 and HAT2, in HAT2-NO2 the molecules are arranged in stacks”

**
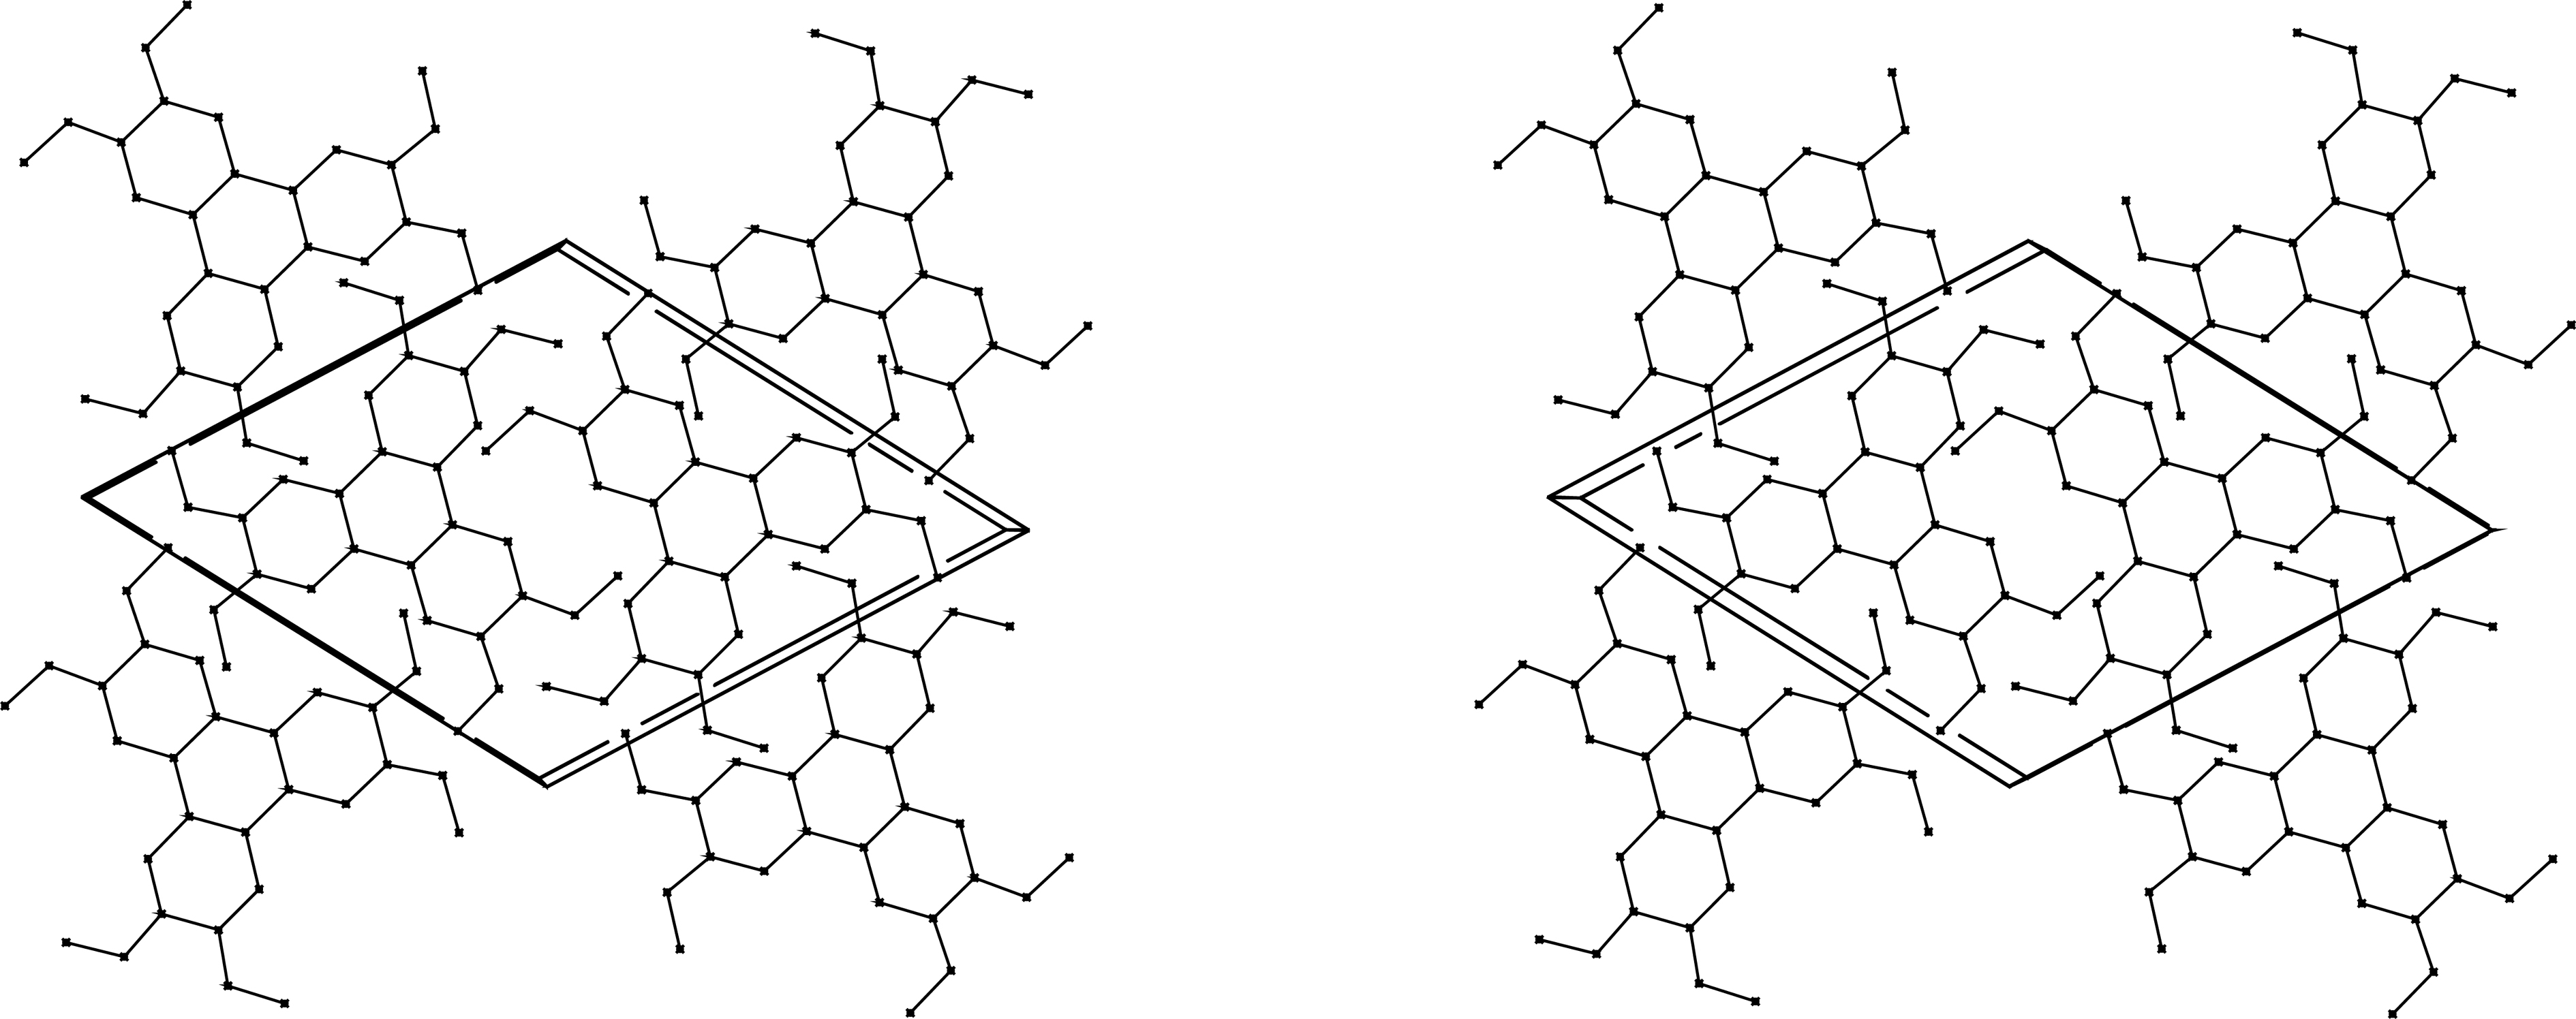
Fig 1** Stereo-view of HAT1 as a projection normal to the 001 axis. No stacking or pi-overlap is observed. The illustration was generated from the data available within the CCDC database.11

**
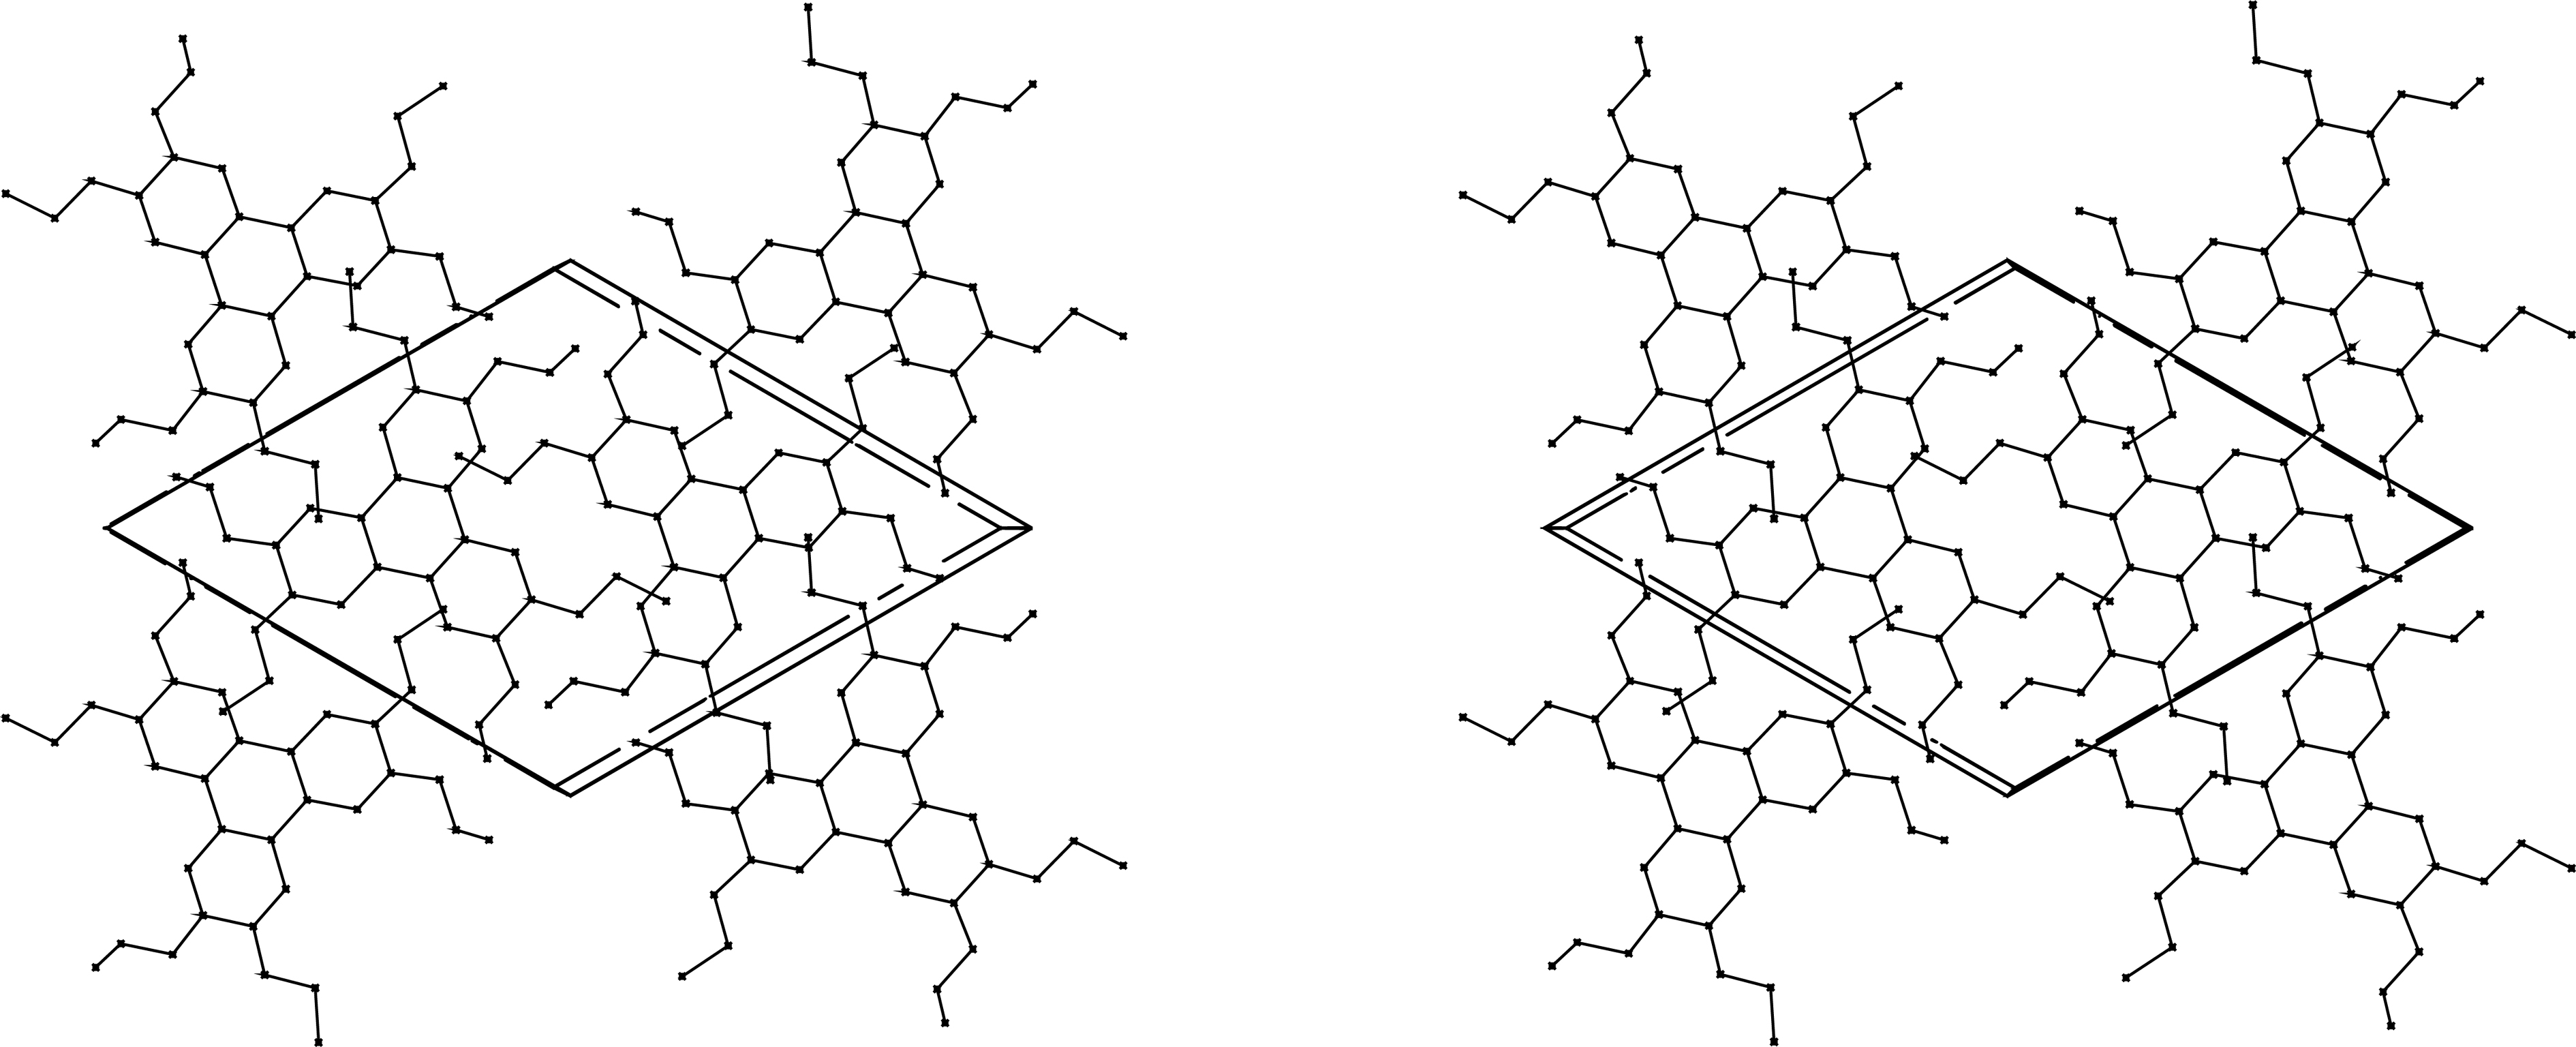
Fig 2** Stereo-view of HAT2 as a projection normal to the 001 axis. No stacking or pi-overlap is observed. The illustration was generated from the data available within the CCDC database.11

TP6EO2M and HAT2-NO2.

**Fig 3** Stereo-view of HAT2-NO2 as a projection normal to the 010 axis. In this case the propensity to stack is more obvious and there is very little lateral displacement between molecules in adjacent layers.

“The stacks are tilted at an angle of ~41° to the ‘best plane’ through the aromatic core. This kind of stacking is reminiscent of that found in TP6EO2M12”

**
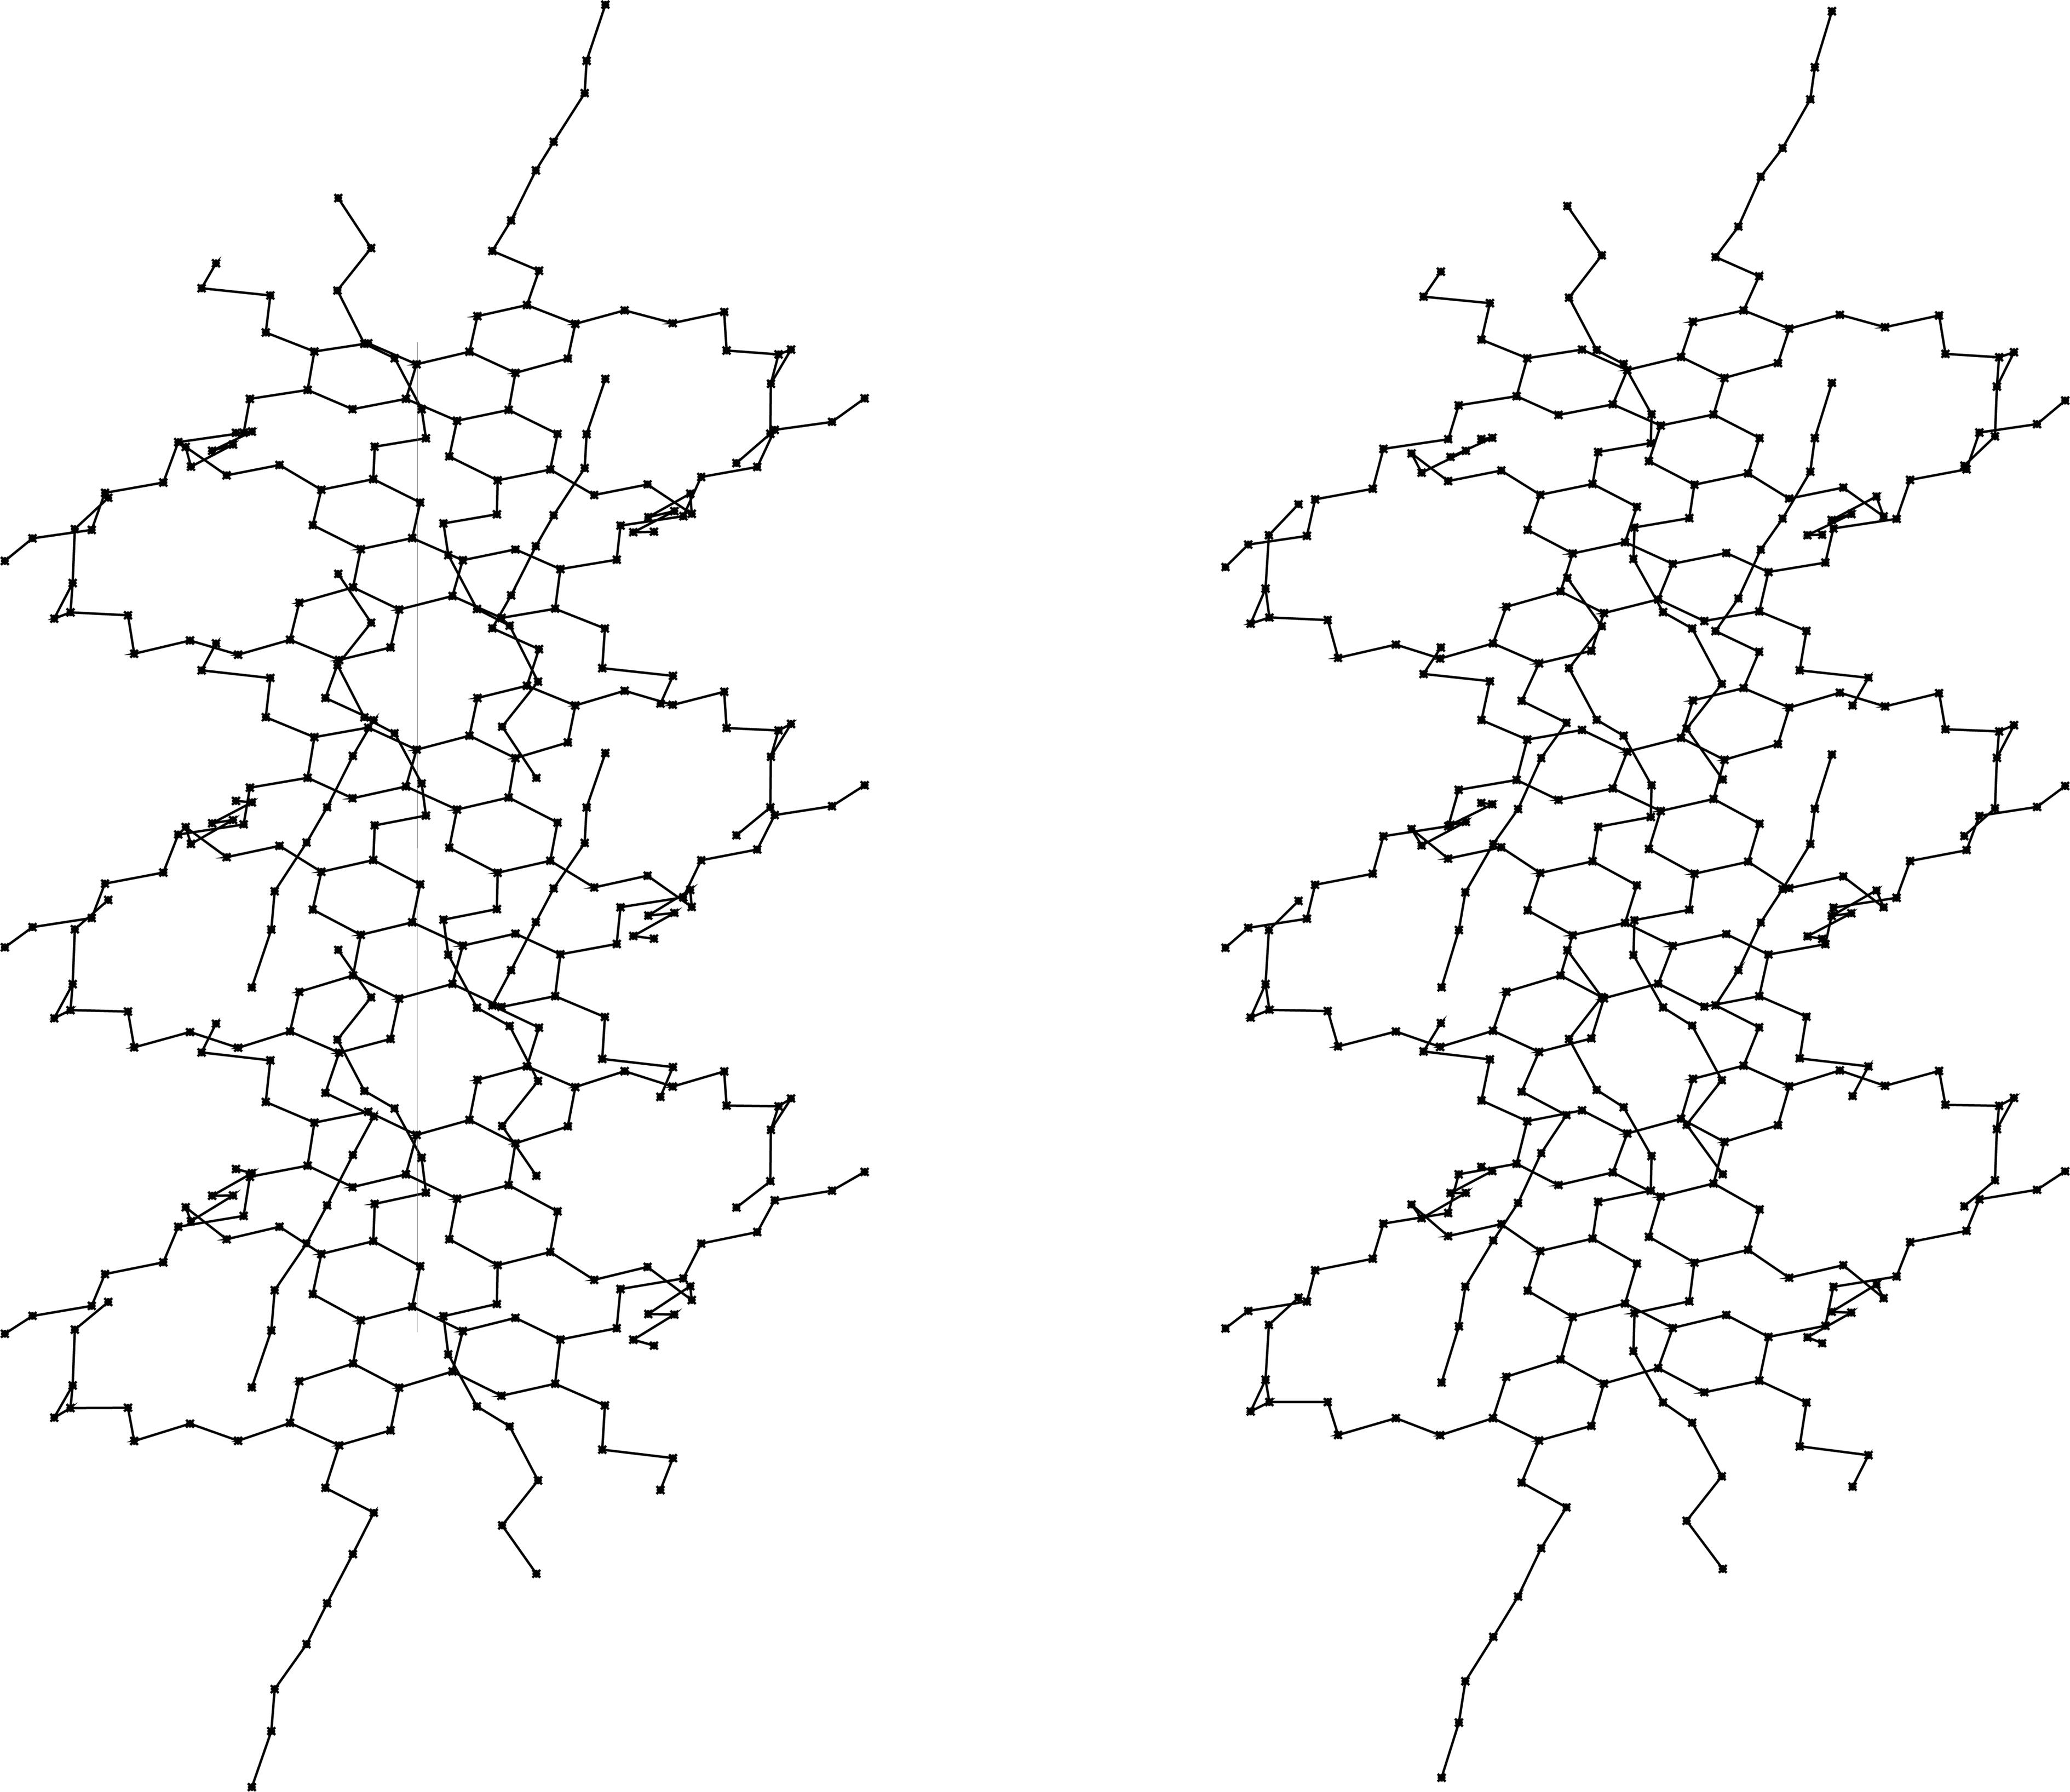
Fig 4** Stereo-view of TP6EO2M as a projection normal to the 001 axis. The molecules form tilted stacks. The illustration was generated from the data available within the CCDC database.12

References

**Fig 5** Stereo-view of HAT2-NO2 as a projection normal to the 001 axis. The molecules form stacks with a tilt angle of 41°.

1 Boettcher, *Physica,* 1939, ***6***, 59.

2 O. R. Lozman, *Unpublished Results,* 2001.

3 *PM3 as implemented in v5.1 HyperCube Inc. 2000. DFT calculations performed in HyperChem v7.00 Evaluation Copy, HyperCube Inc. 2002.*

4 Trotter, *Acta Crystallogr., Sect. A: Found. Crystallogr.,* 1959, ***12***, 884; D. A. Fletcher; R. F. McMeeking; D. Parkin, *J Chem Inf Comp Sci,* 1996, ***36***, 746.

5 H. Furuya; S. Okamoto; A. Abe; G. Petekidis; G. Fytas, *J Phys Chem-Us,* 1995, ***99***, 6483; K. Hori; Y. Koma; A. Uchida; Y. Ohashi, *Mol Cryst Liq Cryst,* 1993, ***225***, 15.

6 C. Destrade; M. C. Mondon; M. Manickam, *J. Phys. Colloq.,* 1979, ***C3***, 17.

7 N. Boden; R. C. Borner; R. J. Bushby; A. N. Cammidge; M. V. Jesudason, *Liq Cryst,* 1993, ***15***, 851.

8 C. Destrade; N. H. Tinh; H. Gasparoux; J. Malthete; A. M. Levelut, *Mol Cryst Liq Cryst,* 1981, ***71***, 111.

9 C. Vauchier; A. Zann; P. Lebarny; J. C. Dubois; J. Billard, *Mol Cryst Liq Cryst,* 1981, ***66***, 423.

10 L. Y. Chiang; C. R. Safinya; N. A. Clark; K. S. Liang; A. N. Bloch, *J Chem Soc Chem Comm,* 1985, 695.

11 T. L. Andresen; F. C. Krebs; N. Thorup; K. Bechgaard, *Chem Mater,* 2000, ***12***, 2428.

12 N. Boden; R. J. Bushby; M. V. Jesudason; B. Sheldrick, *J Chem Soc Chem Comm,* 1988, 1342.
